# Supplementary figures and images for: TRPV1 Channel Activated by the PGE2/EP4 Pathway Mediates Spinal Hypersensitivity in a Mouse Model of Vertebral Endplate Degeneration
Source: Hindawi journal article supplement (doi:10.1155/2021/9965737), 2021-01-01

Supplementary Figure 3

A

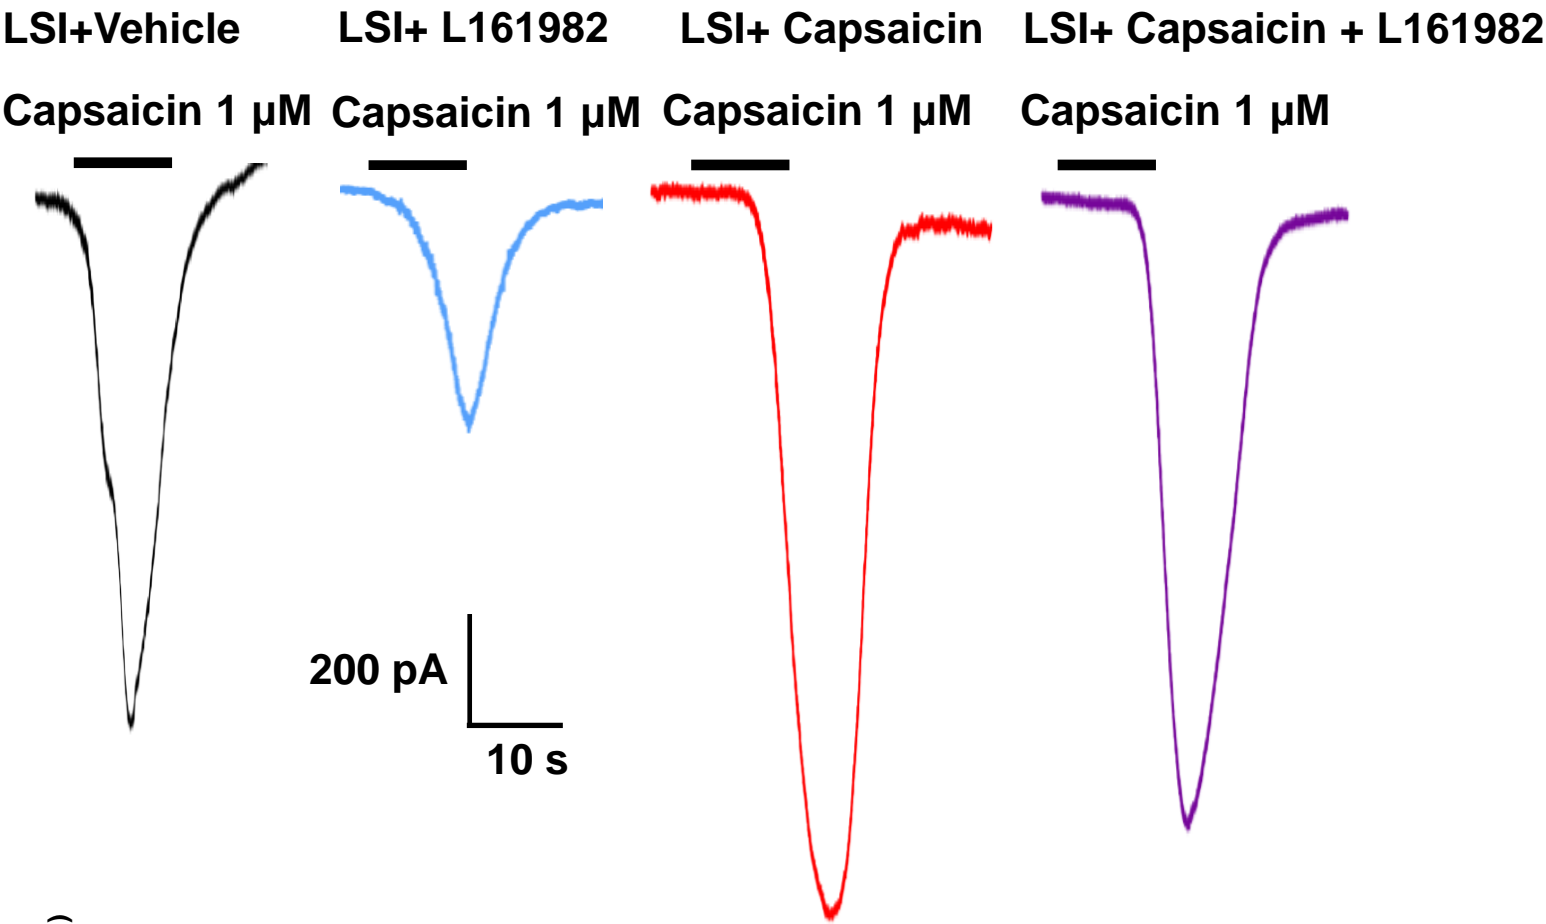

B

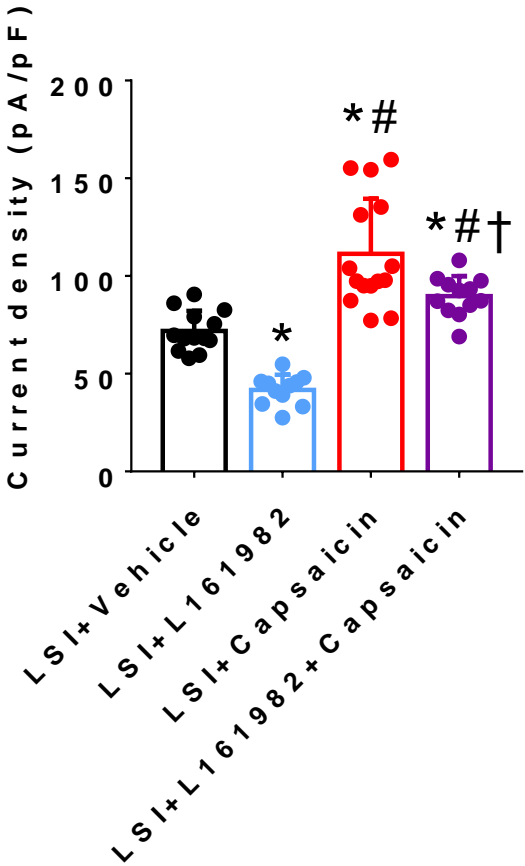

Supplement: f1 [file 9965737.f1.zip]

Supplementary Figure 1

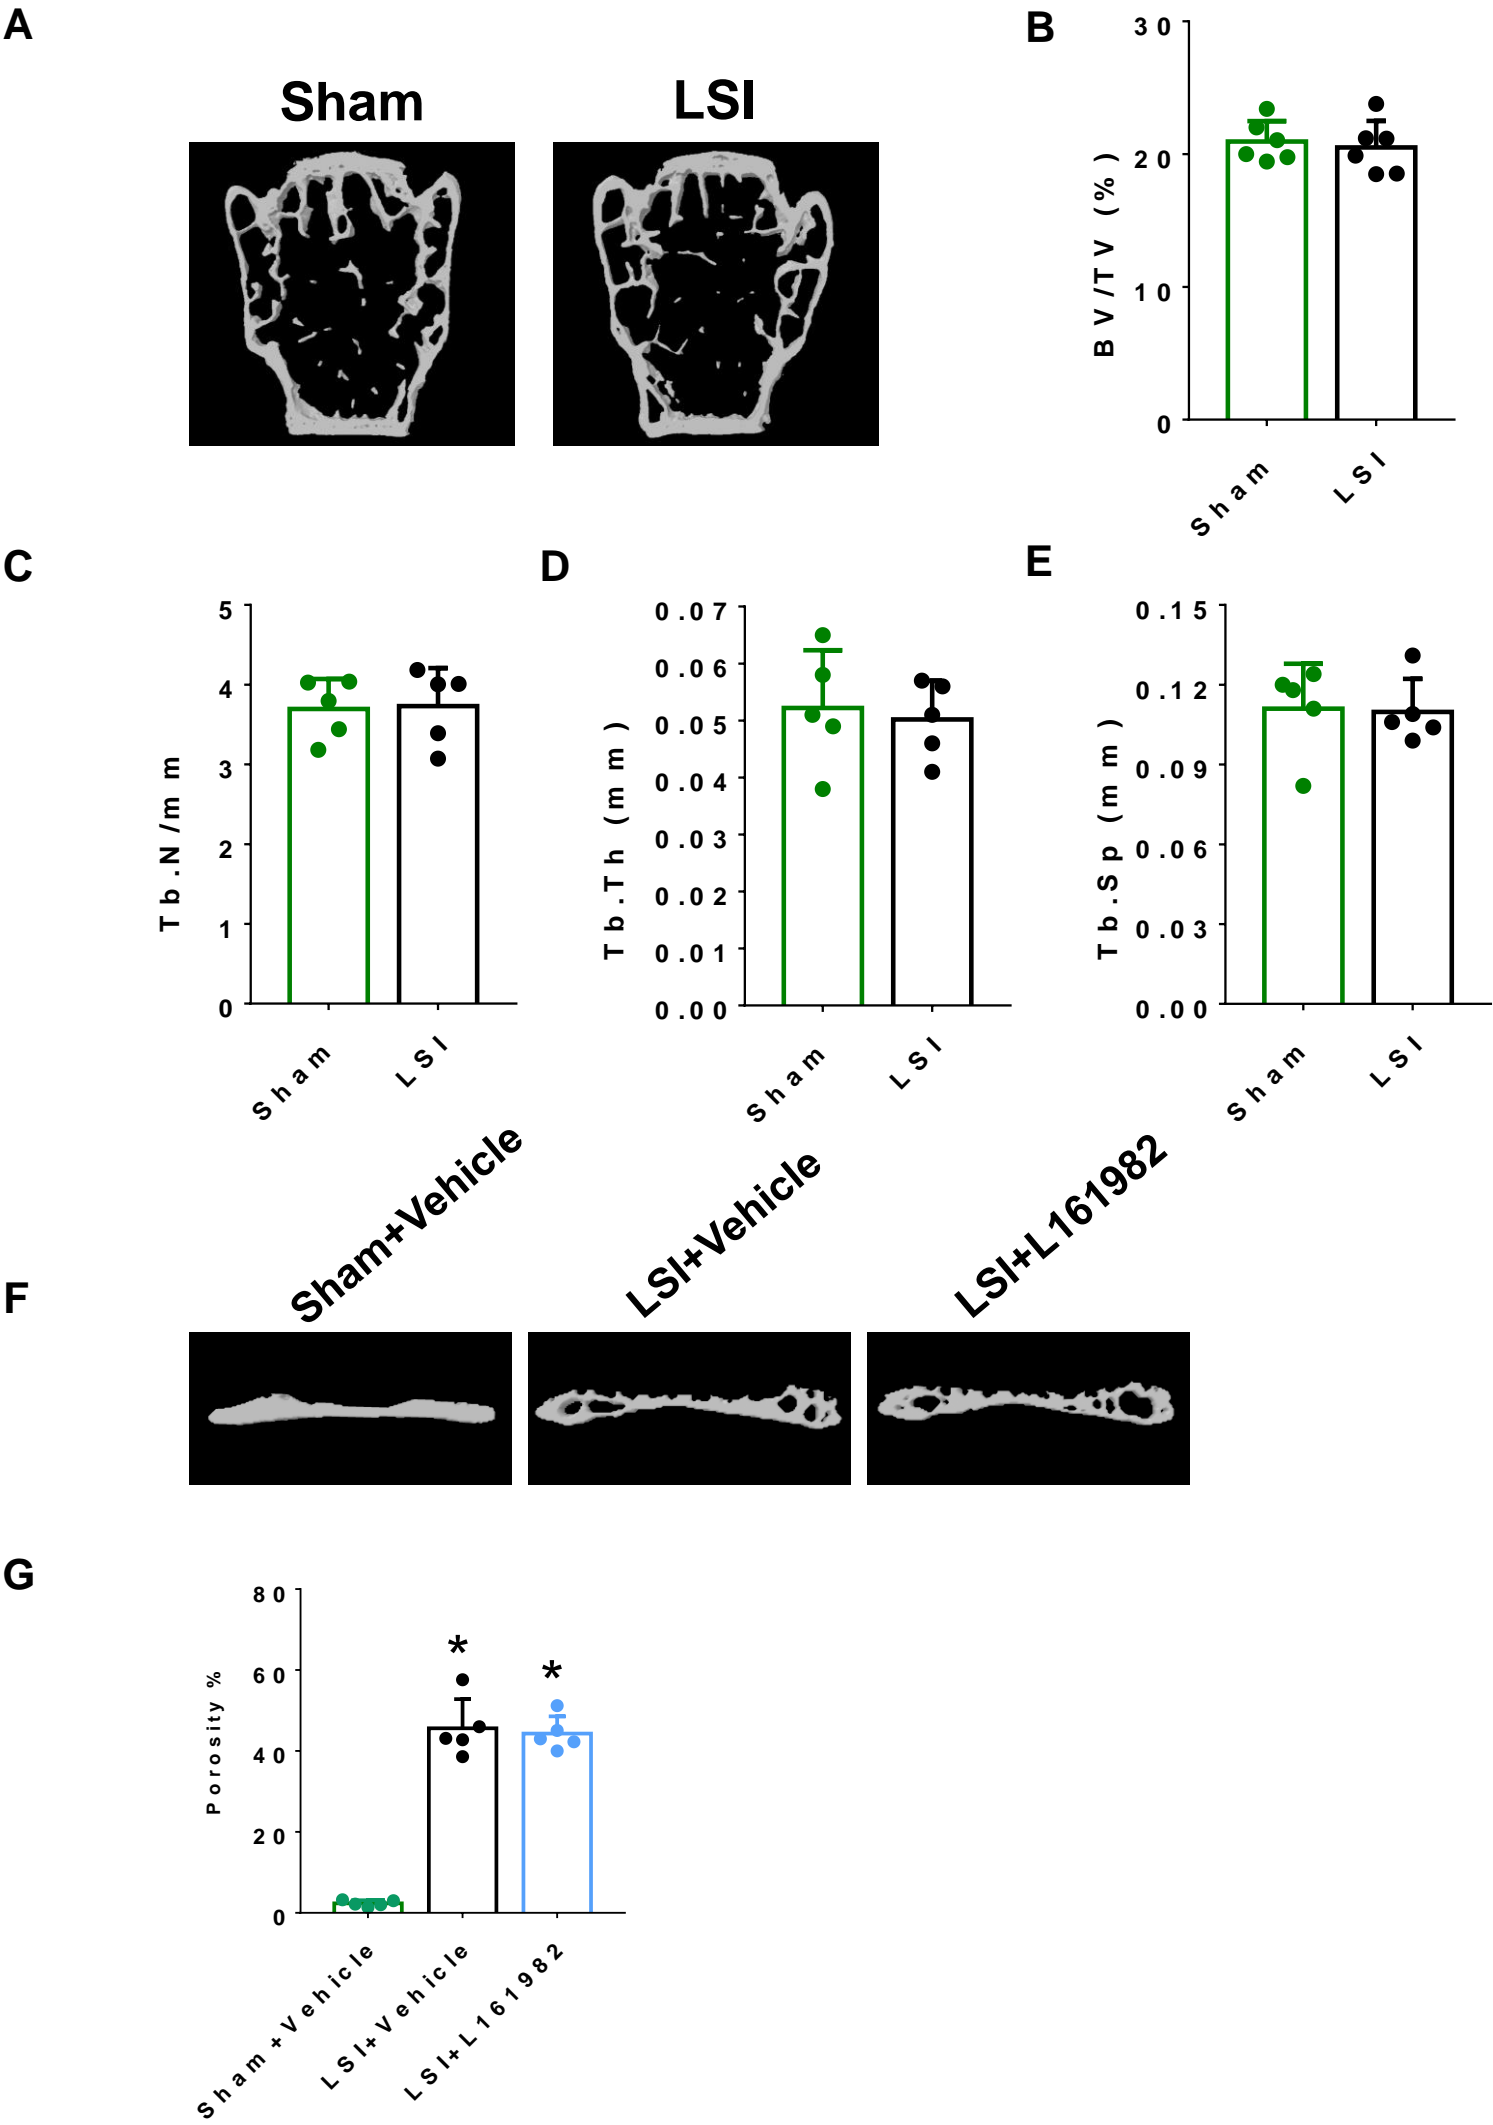

Supplement: f1 [file 9965737.f1.zip]

Supplementary Figure 2

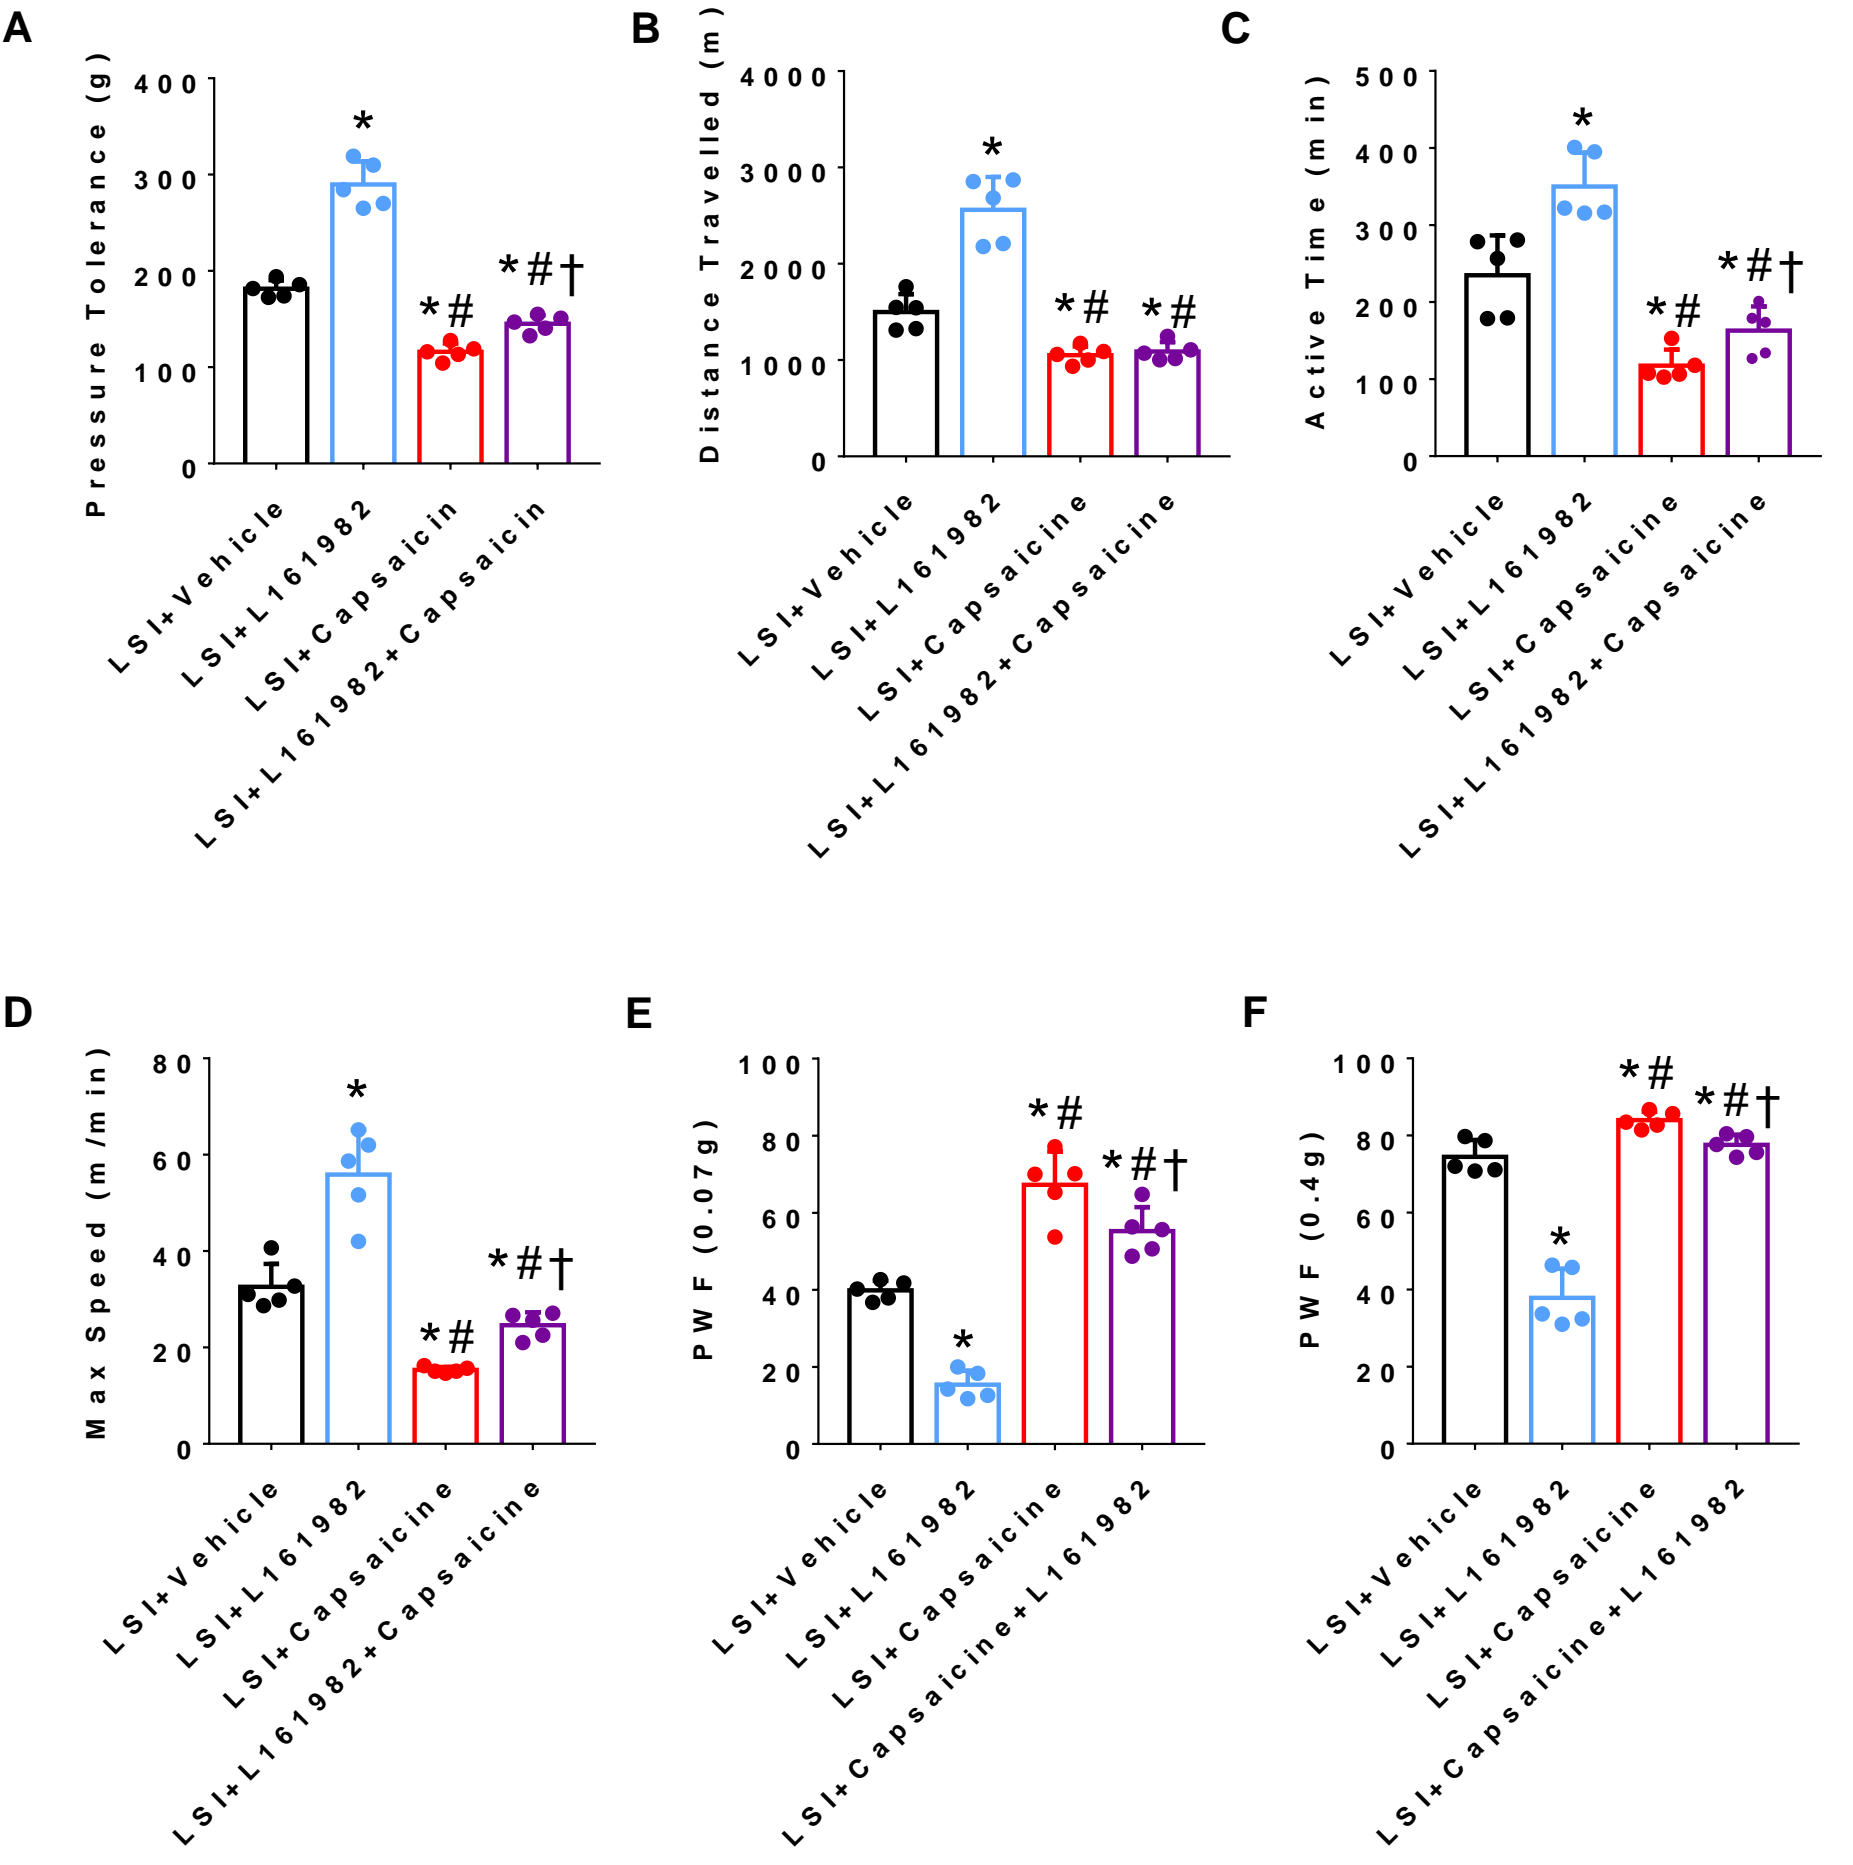

Supplement: f1 [file 9965737.f1.zip]
